# Supplementary material
Source: publisher figshare collection journal article supplement (https://asha.figshare.com/ndownloader/files/24136070)
Supplement: Supplementary file [file 24136070]

**Supplemental Material S2.** Inter-coder reliability for research assistant coders and slp coders for 10% of the discovery sample.

| Variable                     | RA coder | SLP coder 1 (SC) | SLP coder 2 (CB) |
|------------------------------|----------|------------------|------------------|
| Included EHRs (Category 1&2) | 48       | 52               | 52               |
| Excluded EHRs (Category 3&4) | 49       | 45               | 45               |
| Inter-coder Reliability      |          |                  |                  |
| % Agreement (included EHRs)  | -        | 90%              | 88%              |
| % Agreement (excluded EHRs)  | -        | 98%              | 96%              |
| % Agreement (total)          | -        | 94%              | 92%              |
| Intra-coder Reliability      |          |                  |                  |
| % Agreement (included EHRs)  | -        | -                | 90%              |
| % Agreement (excluded EHRs)  | -        | -                | 89%              |

*Note.* Values indicate the number of records classified as Category 1 or 2 (Included) or Category 3 or 4 (Excluded) out of the 97 EHRs manually reviewed (N=97). Speech Language Pathologist (SLP) Coder 1 is author SC, and SLP Coder 2 is author CB. Research Assistant (RA) coder is the final agreement of coding between authors CEW and RN. EHR = Electronic Health Record. Intra-coder reliability between the two SLP Clinician Coder uses SLP Coder 1 (author SC) as the gold standard to which author CB’s coding is compared.
